# Supplementary material
Source: publisher figshare collection journal article supplement (https://acs.figshare.com/ndownloader/files/3921271)
Supplement: Supplementary file 1 [file 3921271]

## Supporting Information

# Acene-containing Donor-acceptor Conjugated Polymers: Correlation between the Structure of Donor Moiety, Charge Carrier Mobility, and Charge Transport Dynamics in Electronic Devices.

*Gi Eun Park, Jicheol Shin, Dae Hee Lee, Tae Wan Lee, Hyunseok Shim, Min Ju Cho, Seungmoon Pyo,\* and Dong Hoon Choi\**

Department of Chemistry, Research Institute for Natural Sciences, Korea University, 5 Anam-dong, Sungbuk-gu, Seoul 136-701, South Korea.

Department of Chemistry, Konkuk University, 1 Hwayang-dong, Kwangjin-gu, Seoul 143-701, South Korea.

**KEYWORDS** acene, conjugated copolymer, thin film transistor, charge transport dynamics, inverter

## 1. Gel permeation chromatograms of acene-containing conjugated polymers

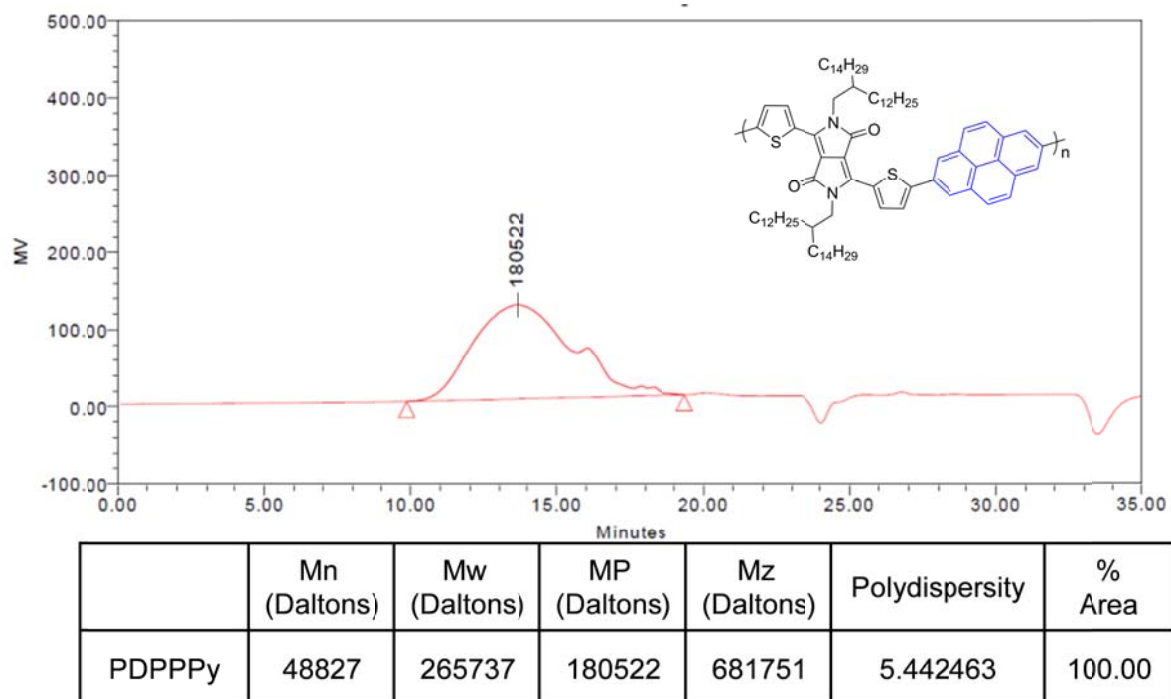

**Figure S1.** GPC chromatogram of PDPPPy..

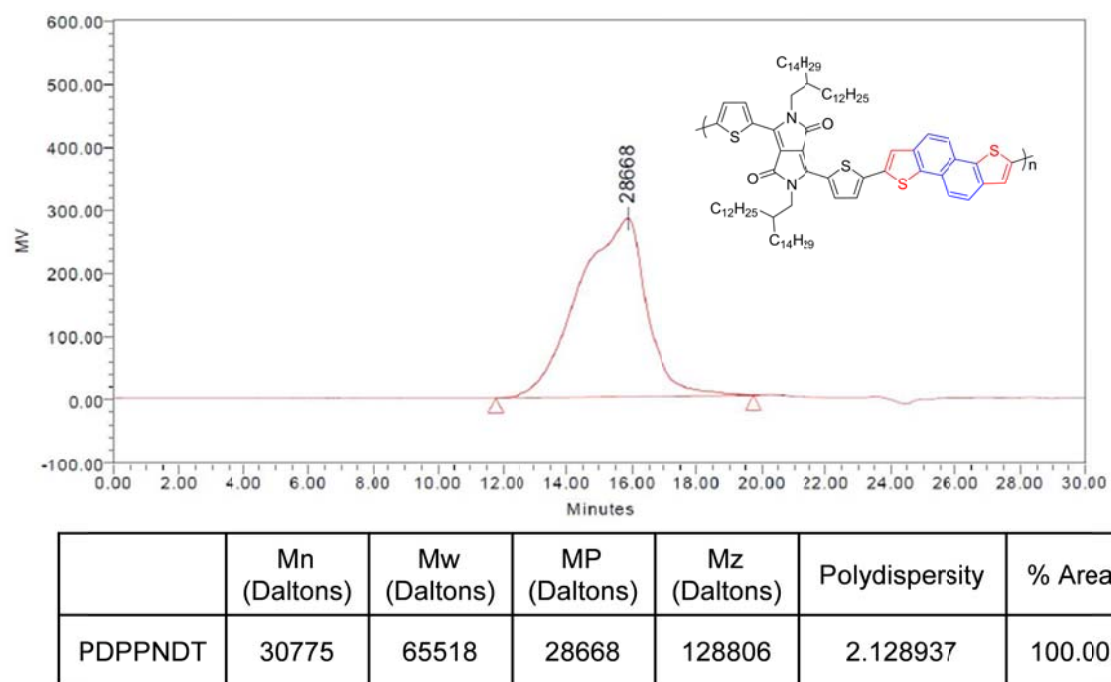

**Figure S2.** GPC chromatogram of PDPPNDT.

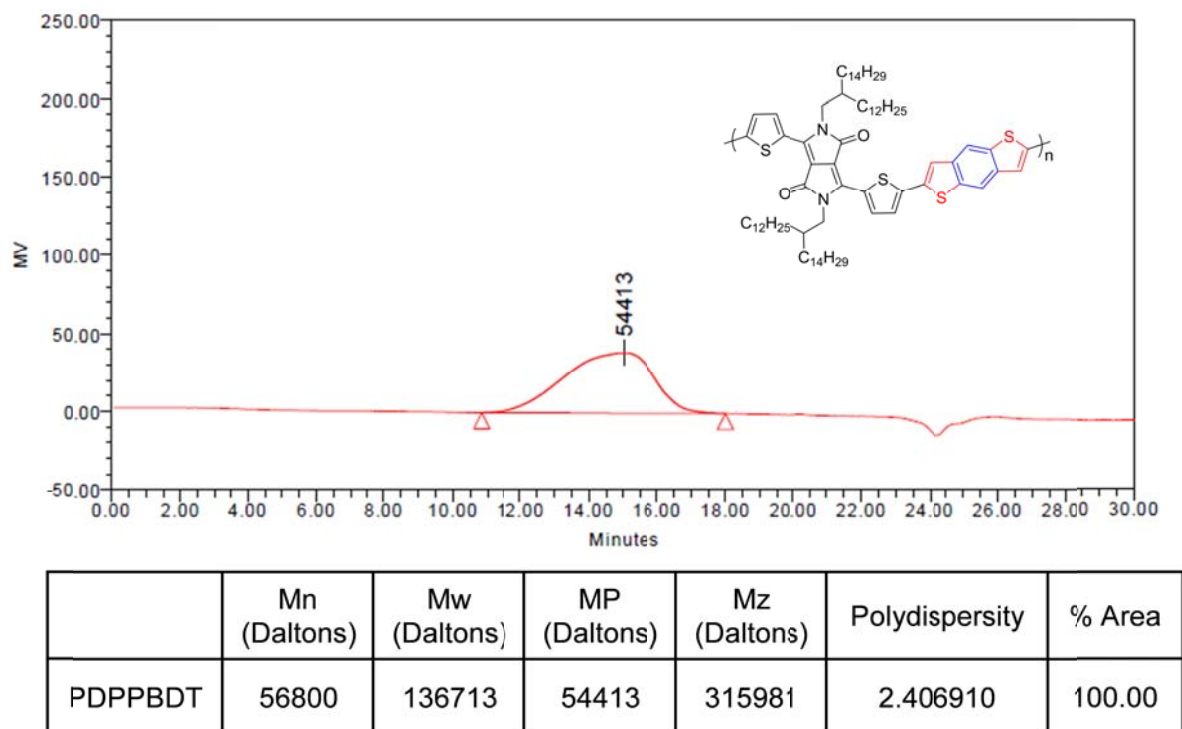

**Figure S3.** GPC chromatogram of PDPPBDT.

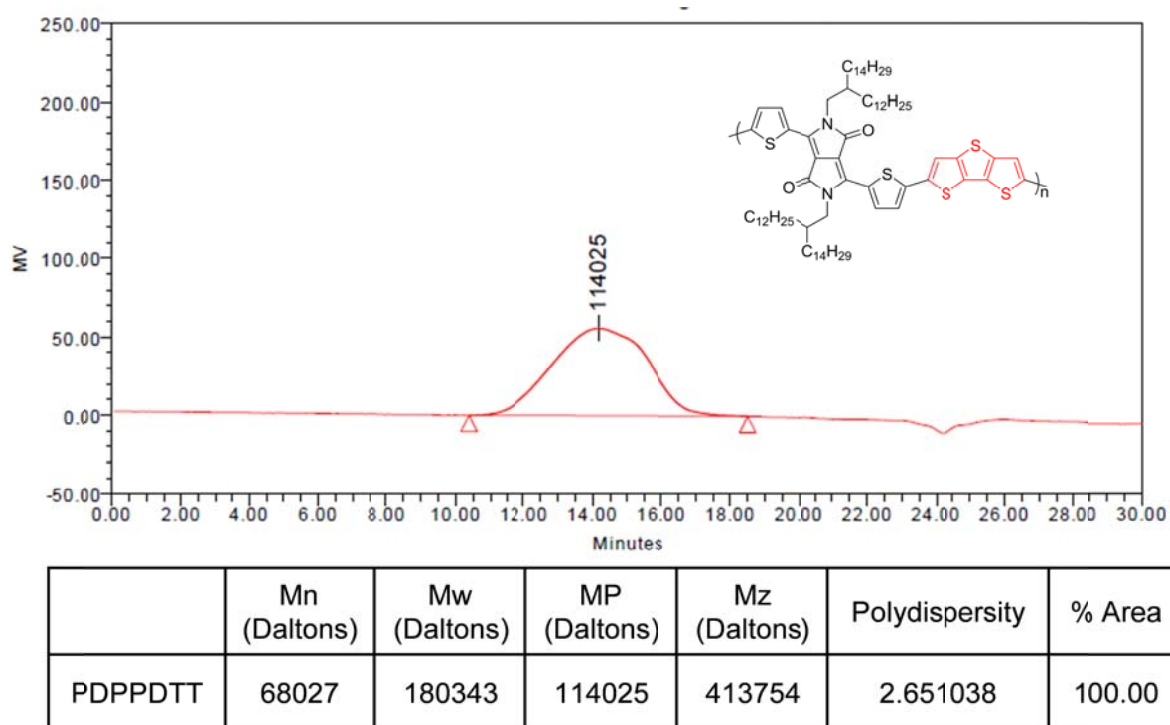

**Figure S4.** GPC chromatogram of PDPPDTP.

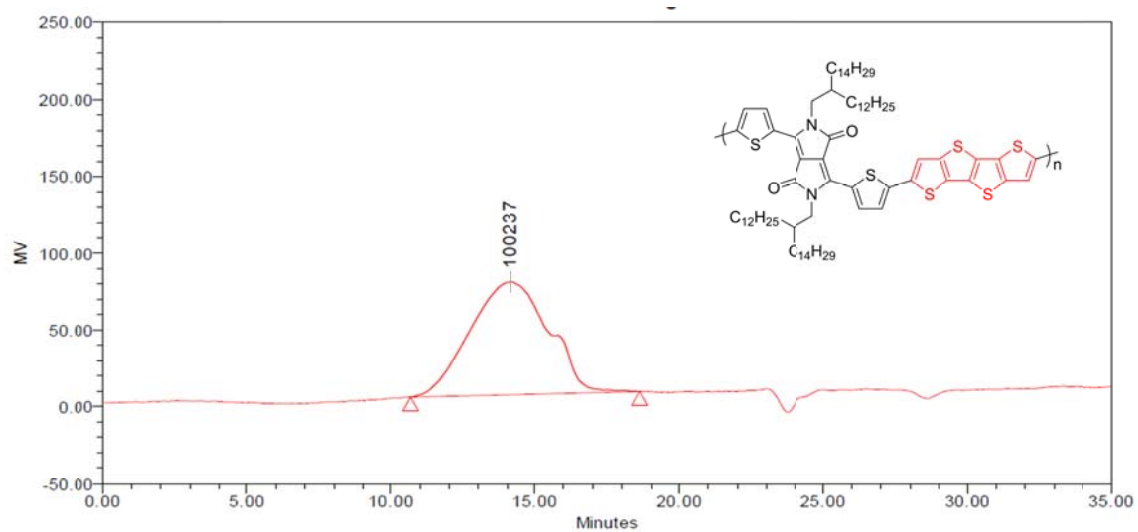

|          | Mn<br>(Daltons) | Mw<br>(Daltons) | MP<br>(Daltons) | Mz<br>(Daltons) | Polydispersity | % Area |
|----------|-----------------|-----------------|-----------------|-----------------|----------------|--------|
| PDPPTTTT | 58115           | 171677          | 100237          | 396425          | 2.954088       | 100.00 |

**Figure S5.** GPC chromatogram of PDPPTTTT.

## 2. Synthesis of acene-containing conjugated polymers

### Synthesis of PDPPPy (1)

To a degassed 7 mL toluene solution of 2,7-bis(4,4,5,5-tetramethyl-1,3,2-dioxaborolan-2-yl)-pyrene (73 mg, 0.16 mmol), 2,5-di(2-dodecylhexadecyl)-3,6-bis-(5-bromothiophenyl)-1,4-diketopyrrolo[3,4-c]pyrrole (200 mg, 0.16 mmol),  $K_2CO_3$  (1.68 mg, 0.008 mmol), and three drops of Aliquat 336 were added with 0.7 mL of degassed demineralized water.  $Pd_2(dba)_3$  (3 mg, 2 mol% ) and  $P(o\text{-tolyl})_3$  (4 mg, 8 mol%) were then added to the reaction mixture. The reaction solution was allowed to stir for 3 h at 90 °C under argon atmosphere. The slightly viscous dark blue solution was cooled down to room temperature. It was poured into a 200 mL methanol/HCl (1 M solution) (9:1 v/v) to obtain polymer precipitates. The crude polymer was collected by filtration and then purified by Soxhlet extraction with acetone, hexane, and chloroform, successively. The polymer was obtained as a dark blue solid (184 mg, 87%).  $M_n = 48.83$  kDa,  $M_w = 265.7$  kDa, and PDI = 5.44.  $^1H$  NMR (300MHz);  $\delta$ (ppm) 0.67-1.68 (br. 108H, aliphatic-H); 8.52-9.23 (br. 12H, aromatic-H). Anal. calcd for  $C_{88}H_{132}N_2O_2S_2$ : C 80.43, H 10.12, N 2.13, S 4.88; found: C 80.12, H 9.99, N 2.03, S, 4.59.  $\nu_{max}$  (PDPPPy film on KBr pellet / $cm^{-1}$ ) : 2992-2809 (CH stretch), 1660 (C=O), 1552, 1427 (C=C aromatic stretch)

### Synthesis of PDPPNDT, (2) <sup>1</sup>

2,5-Di(2-dodecylhexadecyl)-3,6-bis-(5-bromothiophenyl)-1,4-diketopyrrolo[3,4-c]pyrrole (150 mg, 0.012 mmol) and bis(trimethyl-stannyl)NDT (68.3 mg, 0.012 mmol) were dissolved in 15 mL of degassed anhydrous toluene. Subsequently, a catalyst,  $Pd_2(dba)_3$  (1.5 mg, 2 mol%) and  $P(o\text{-tolyl})_3$  (2 mg, 8 mol%), were added to the reaction mixture, and the mixture was kept at 95 °C for 36 h under argon atmosphere. Then, the mixture was cooled down to

room temperature, and the polymer precipitated in a 200 mL methanol/HCl (1 M solution) (9:1 v/v). The crude polymer was collected by filtration and then purified by Soxhlet extraction with acetone, hexane, and chloroform, successively. The resulting polymer was obtained as dark green-purple solid (114 mg, 72%).  $M_n = 30.7$  kDa,  $M_w = 65.5$  kDa, and PDI = 2.13.  $^1\text{H}$  NMR (300MHz,  $\text{CDCl}_3$ );  $\delta(\text{ppm})$  0.63-1.66 (br. 108H, aliphatic-H); 8.26-9.25 (br. 10H, aromatic-H). Anal. calcd for  $\text{C}_{88}\text{H}_{134}\text{N}_2\text{O}_2\text{S}_4$ : C 76.54, H 9.79, N 2.03, S 9.29; found: C 76.10, H 9.58, N 2.10, S 9.45.  $\nu_{\text{max}}$  (PDPPNDT film on KBr pellet/ $\text{cm}^{-1}$ ): 2981-2805 (CH stretch), 1663 (C=O), 1551, 1428 (C=C aromatic stretch).

### Synthesis of PDPPBDT, (3)

2,5-Di(2-dodecylhexadecyl)-3,6-bis-(5-bromothiophenyl)-1,4-diketopyrrolo[3,4-c]pyrrole (130 mg, 0.01 mmol) and bis(trimethyl-stannyl)BDT (65 mg, 0.01 mmol) were dissolved in 12 mL of degassed anhydrous toluene. Subsequently, a catalyst,  $\text{Pd}_2(\text{dba})_3$  (1.5 mg, 2 mol%) and  $\text{P}(o\text{-tolyl})_3$  (2 mg, 8 mol%), were added to the reaction mixture, and the mixture was kept at 95 °C for 37 h under argon atmosphere. Then, the mixture was cooled down to room temperature, and the polymer precipitated in a 200 mL methanol/HCl (1 M solution) (9:1 v/v). The crude polymer was collected by filtration and then purified by Soxhlet extraction with acetone, hexane, and chloroform, successively. The resulting polymer was obtained as dark green-purple solid (127 mg, 93%).  $M_n = 56.8$  kDa,  $M_w = 136.7$  kDa, and PDI = 2.40.  $^1\text{H}$  NMR (300MHz);  $\delta(\text{ppm})$  0.75-1.65 (br, 108H, aliphatic-H); 8.34-9.20 (br, 8H, aromatic-H). Anal. calcd for  $\text{C}_{82}\text{H}_{128}\text{N}_2\text{O}_2\text{S}_4$ : C 75.63, H 9.91, N 2.15, S 9.85; found: C 75.54, H 9.87, N 2.01, S 9.72.  $\nu_{\text{max}}$  (PDPPBDT film on KBr pellet/ $\text{cm}^{-1}$ ): 3003-2802 (CH stretch), 1664 (C=O), 1555, 1431 (C=C aromatic stretch).

### Synthesis of PDPPDIT (4)

PDPPDTT was synthesized with the same method used for PDPPBDT using 2,5-di(2-dodecylhexadecyl)-3,6-bis-(5-bromothiophenyl)-1,4-diketopyrrolo[3,4-c]pyrrole (100 mg, 0.08 mmol) and bis(trimethyl-stannyl)DTT (50 mg, 0.1 mmol). The polymerization mixture was kept at 95 °C for 2 days. The resulting polymer was obtained (100 mg, 95%).  $M_n$  = 68.0 kDa,  $M_w$  = 180.0 kDa, and PDI = 2.65.  $^1\text{H}$  NMR (300MHz);  $\delta$ (ppm) 0.75-1.66 (br, 108H, aliphatic-H); 8.24-9.25 (br, 6H, aromatic-H). Anal. calcd for  $\text{C}_{78}\text{H}_{120}\text{N}_2\text{O}_2\text{S}_5$ : C 73.30, H 9.46, N 2.19, S 12.54; found: C 72.18, H 9.33, N 1.99, S 12.63.  $\nu_{\text{max}}$  (PDPPDTT film on KBr pellet/ $\text{cm}^{-1}$ ) : 2990-2807 (CH stretch), 1664 (C=O), 1551, 1431 (C=C aromatic stretch).

#### **Synthesis of PDPPTTTT (5)**

PDPPDTT was synthesized with the same method used for PDPPBDT using bis(trimethyl-stannyl)TTTT (46 mg, 0.08 mmol) and 2,5-di(2-dodecylhexadecyl)-3,6-bis-(5-bromothiophenyl)-1,4-diketopyrrolo[3,4-c]pyrrole. The polymerization mixture was kept at 95 °C for 10 h. The pure polymer was obtained as a dark green-purple solid (106 mg, 98%).  $M_n$  = 58.1 kDa,  $M_w$  = 171.7 kDa, and PDI = 2.95.  $^1\text{H}$  NMR (300MHz);  $\delta$ (ppm) 0.72-1.68 (br, 108H, aliphatic-H); 8.21-9.24 (br, 6H, aromatic-H). Anal. calcd for  $\text{C}_{80}\text{H}_{120}\text{N}_2\text{O}_2\text{S}_6$ : C 72.02, H 9.07, N 2.10, S 14.42; found: C 72.17, H 9.11, N 1.99, S 14.88.  $\nu_{\text{max}}$  (PDPPTTTT film on KBr pellet/ $\text{cm}^{-1}$ ) : 3002-2821 (CH stretch), 1664 (C=O), 1551, 1434 (C=C aromatic stretch).

### 3. FT-IR spectra of the monomers and polymers.

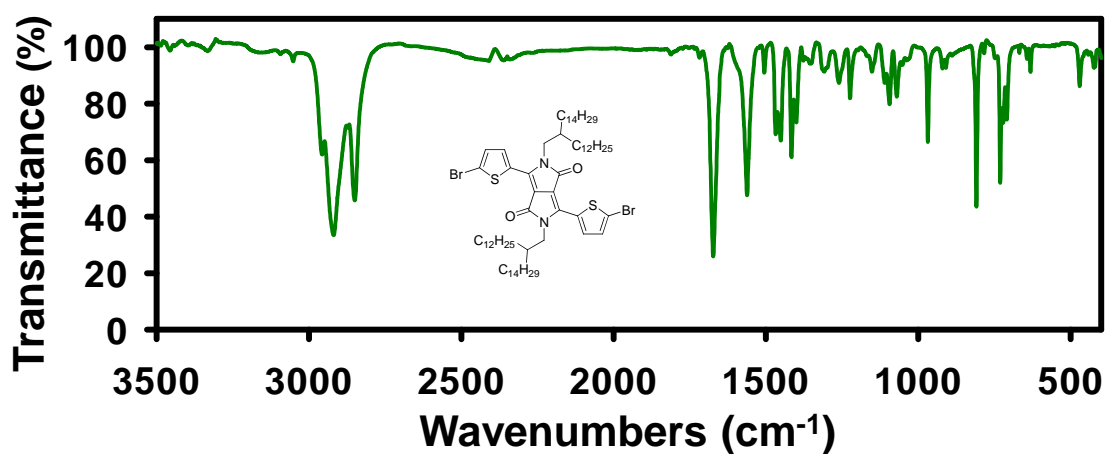

**Figure S6.** FT-IR spectrum of 2,5-di(2-dodecylhexadecyl)-3,6-bis-(5-bromothiophenyl)-1,4-diketopyrrolo[3,4-c]pyrrole.  $\nu_{\max}$  (KBr pellet/cm<sup>-1</sup>) : 2998-2798 (CH stretch), 1673 (C=O), 1561, 1416 (C=C aromatic stretch).

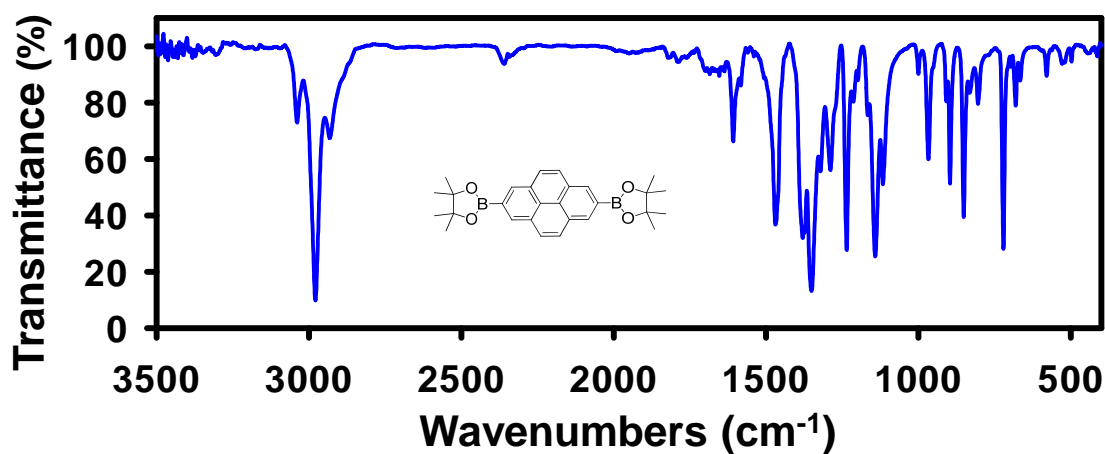

**Figure S7.** FT-IR spectrum of 2,7-bis(4,4,5,5-tetramethyl-1,3,2-dioxaborolan-2-yl)-pyrene.  $\nu_{\max}$  (KBr pellet/cm<sup>-1</sup>) : 3065-2858 (CH stretch), 1462 (C=C aromatic stretch).



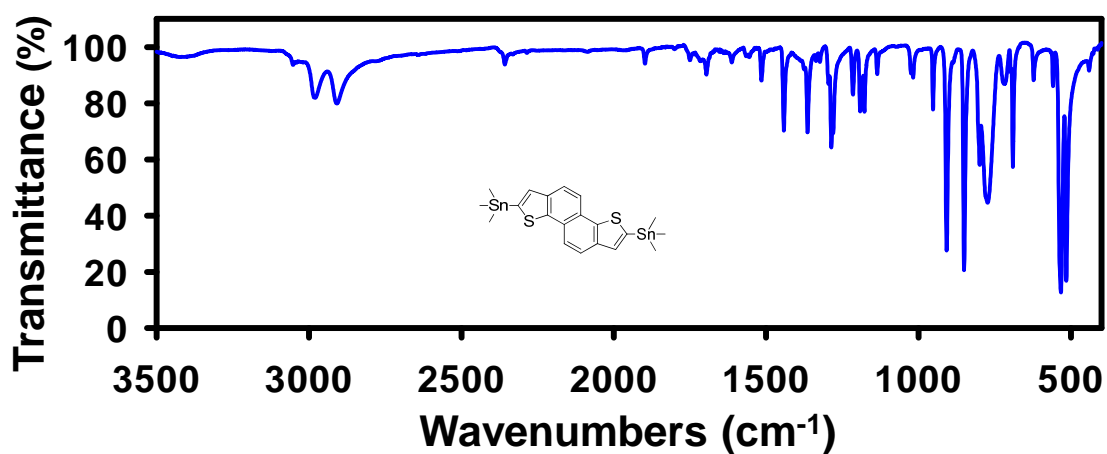

**Figure S8.** FT-IR spectrum of bis(trimethyl-stannyl)NDT.  $\nu_{\max}$  (KBr pellet/ $\text{cm}^{-1}$ ) : 3009-2845 (CH stretch), 1442 (C=C aromatic stretch), 532 (Sn-C stretch).

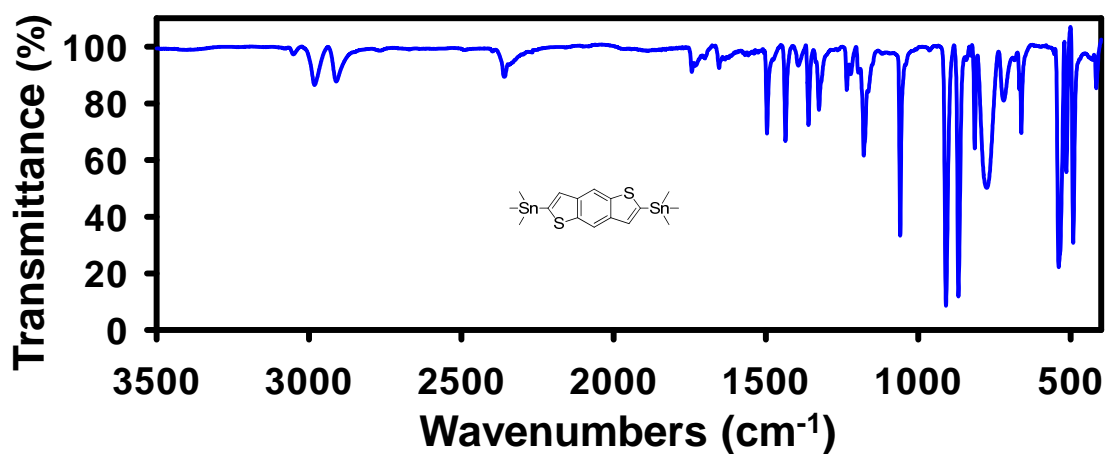

**Figure S9.** FT-IR spectrum of bis(trimethyl-stannyl)BDT.  $\nu_{\max}$  (KBr pellet/ $\text{cm}^{-1}$ ) : 3018-2863 (CH stretch), 1496 (C=C aromatic stretch), 539 (Sn-C stretch).

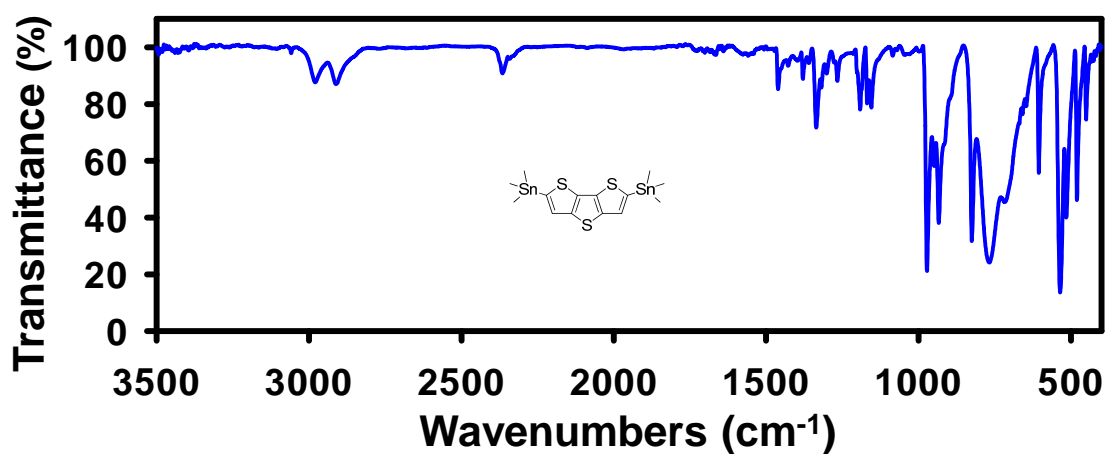

**Figure S10.** FT-IR spectrum of bis(trimethyl-stannyl)DTT.  $\nu_{\max}$  (KBr pellet/ $\text{cm}^{-1}$ ) : 3023-2834 (CH stretch), 1460 (C=C aromatic stretch), 535 (Sn-C stretch).

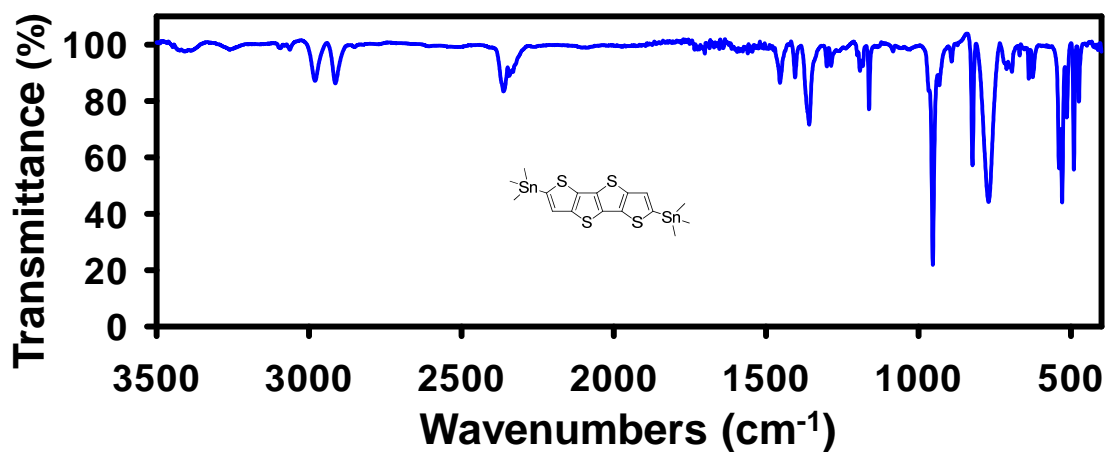

**Figure S11.** FT-IR spectrum of bis(trimethyl-stannyl)TTTT.  $\nu_{\max}$  (KBr pellet/ $\text{cm}^{-1}$ ) : 3014-2879 (CH stretch), 1454 (C=C aromatic stretch), 528 (Sn-C stretch).

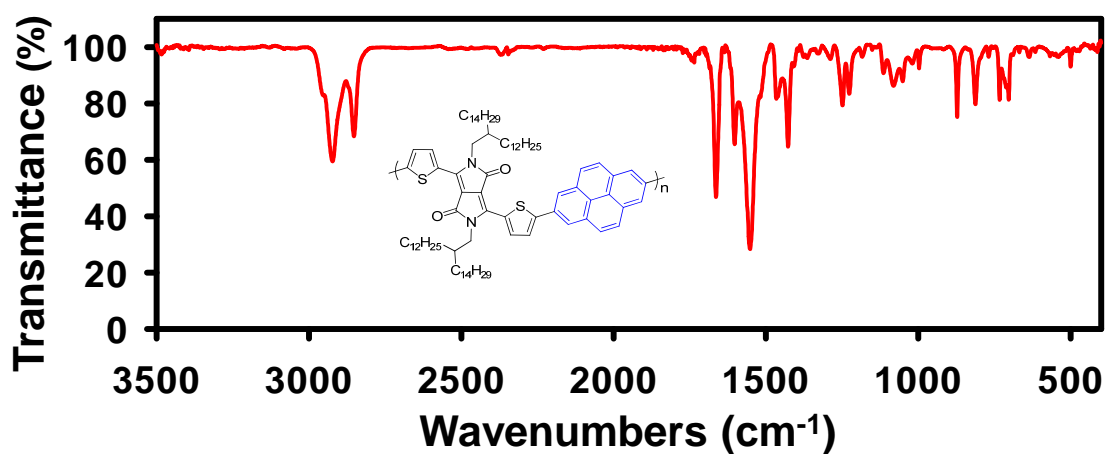

**Figure S12.** FT-IR spectrum of PDPPPy.  $\nu_{\max}$  (PDPPPy film on KBr pellet/ $\text{cm}^{-1}$ ) : 2992-2809 (CH stretch), 1660 (C=O), 1552, 1427 (C=C aromatic stretch).

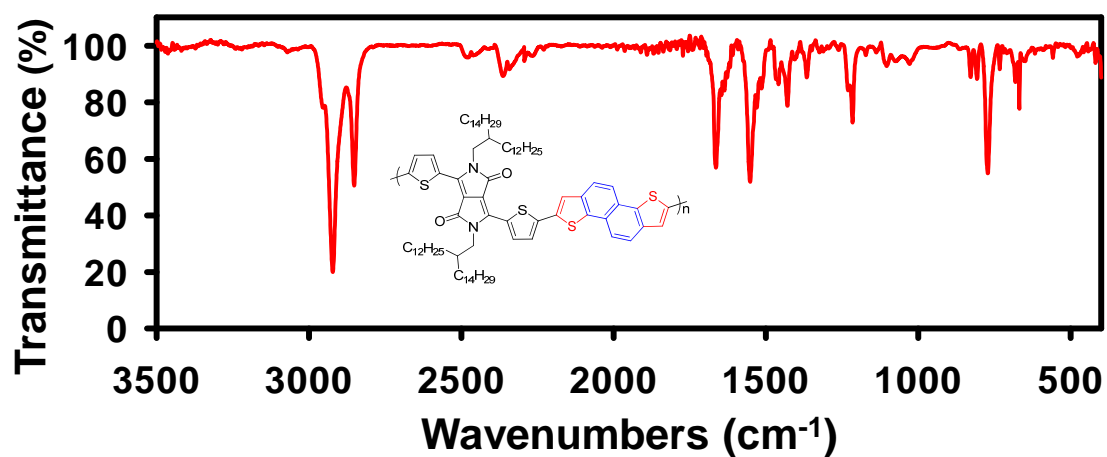

**Figure S13.** FT-IR spectrum of PDPPNDT.  $\nu_{\max}$  (PDPPNDT film on KBr pellet/ $\text{cm}^{-1}$ ) : 2981-2805 (CH stretch), 1663 (C=O), 1551, 1428 (C=C aromatic stretch).

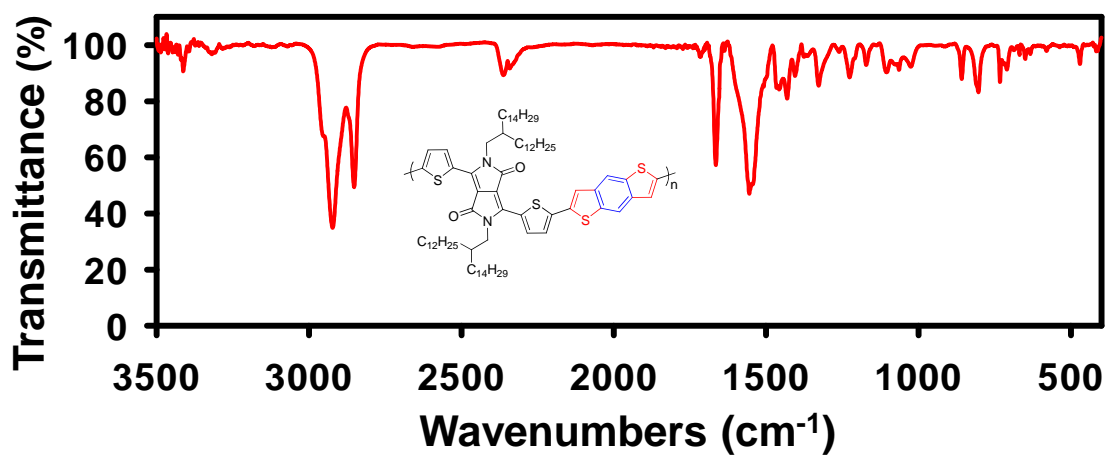

**Figure S14.** FT-IR spectrum of PDPPBDT.  $\nu_{\text{max}}$  (PDPPBDT film on KBr pellet/cm<sup>-1</sup>) : 3003-2802 (CH stretch), 1664 (C=O), 1555, 1431 (C=C aromatic stretch).

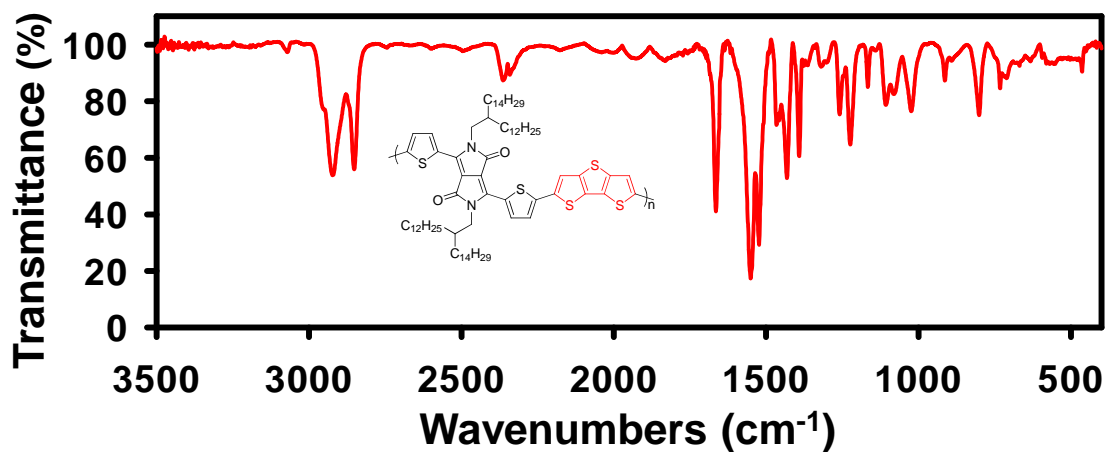

**Figure S15.** FT-IR spectrum of PDPPDTT.  $\nu_{\text{max}}$  (PDPPDTT film on KBr pellet/cm<sup>-1</sup>) : 2990-2807 (CH stretch), 1664 (C=O), 1551, 1431 (C=C aromatic stretch).

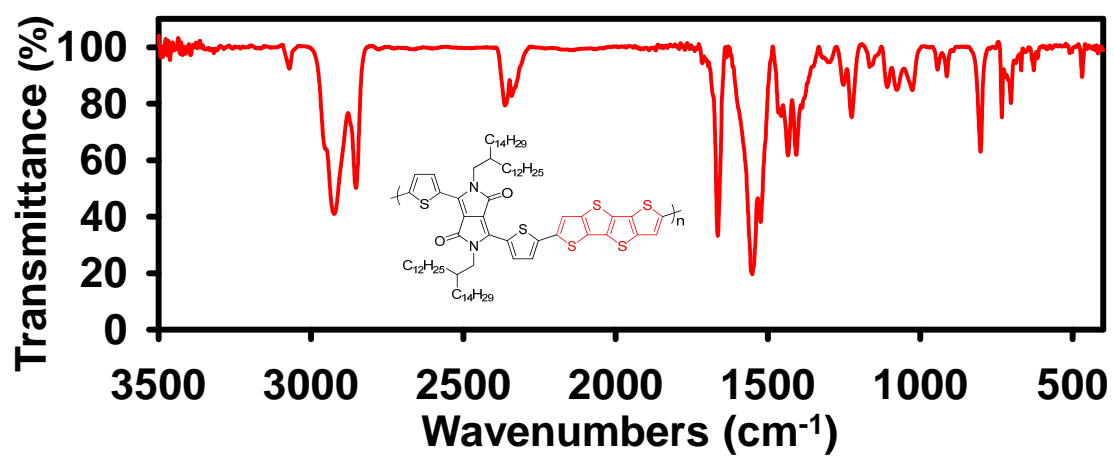

**Figure S16.** FT-IR spectrum of PDPPTTTT.  $\nu_{\max}$  (PDPPTTTT film on KBr pellet/cm<sup>-1</sup>) :  
 3002-2821 (CH stretch), 1664 (C=O), 1551, 1434 (C=C aromatic stretch).

#### 4. NMR spectra of acene-containing conjugated polymers

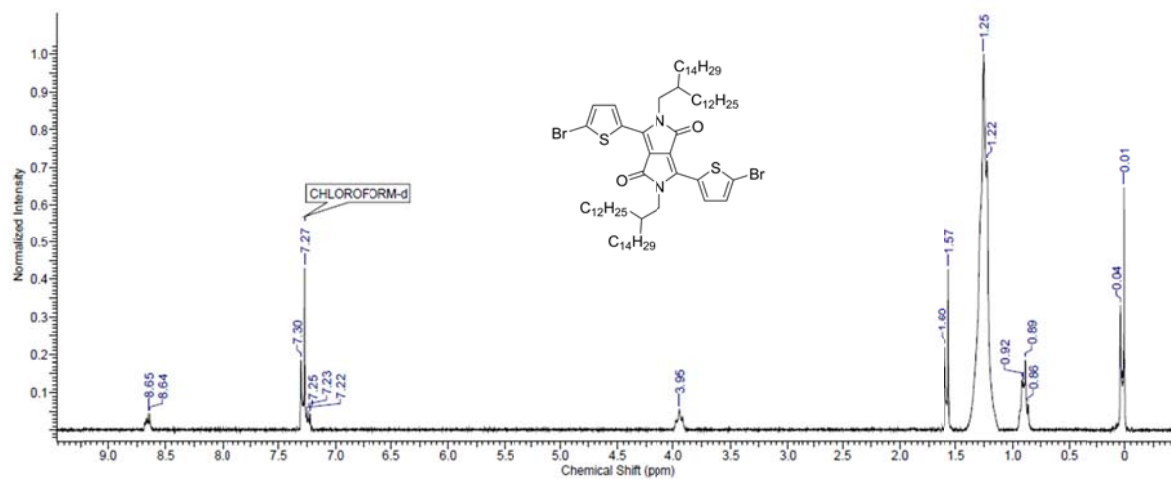

**Figure S17.**  $^1\text{H}$  NMR of 2,5-di(2-dodecylhexadecyl)-3,6-bis-(5-bromothiophenyl)-1,4-diketopyrrolo[3,4-c]pyrrole in  $\text{CDCl}_3$ .

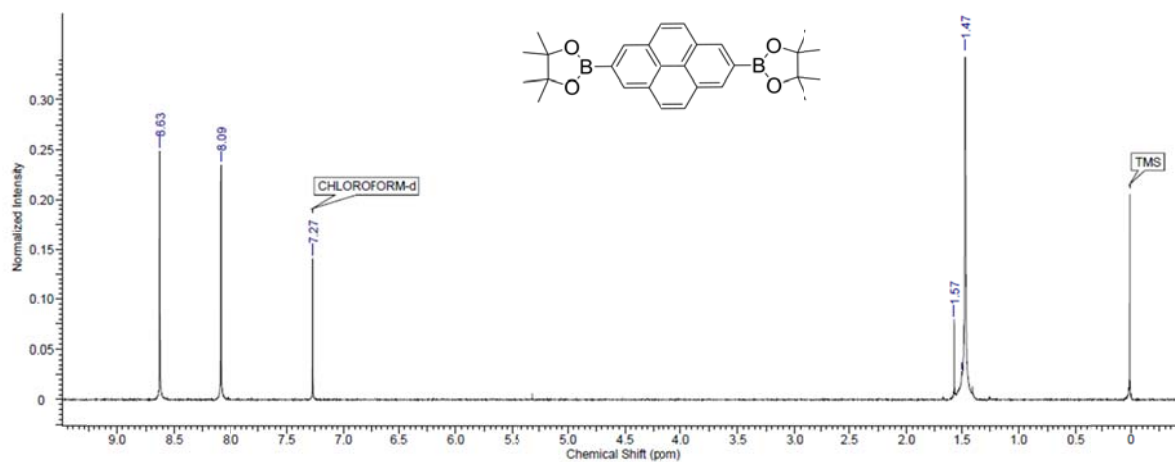

**Figure S18.**  $^1\text{H}$  NMR of 2,7-bis(4,4,5,5-tetramethyl-1,3,2-dioxaborolan-2-yl)-pyrene in  $\text{CDCl}_3$ .

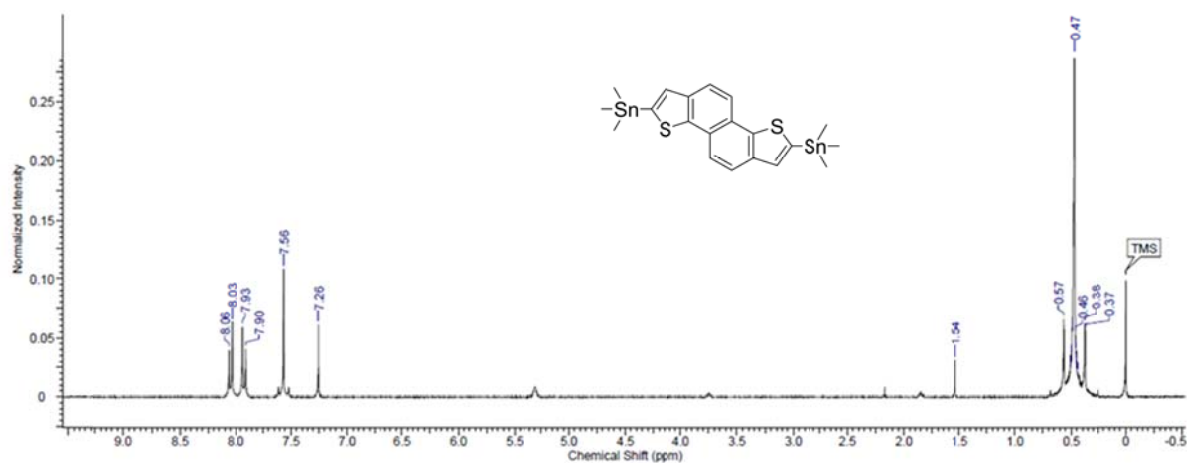

**Figure S19.**  $^1\text{H}$  NMR of bis(trimethyl-stannyl)NDT in  $\text{CDCl}_3$ .

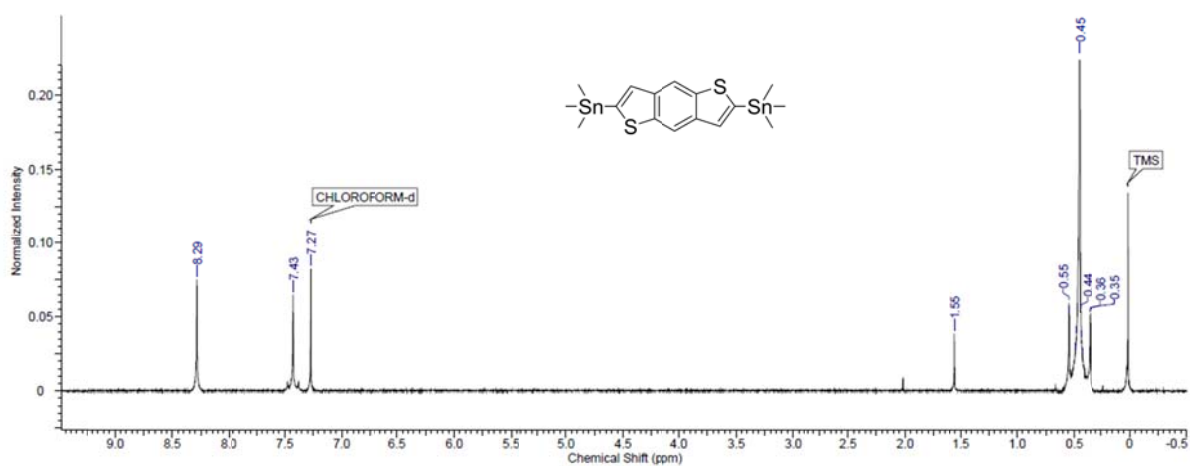

**Figure S20.**  $^1\text{H}$  NMR of bis(trimethyl-stannyl)BDT in  $\text{CDCl}_3$ .

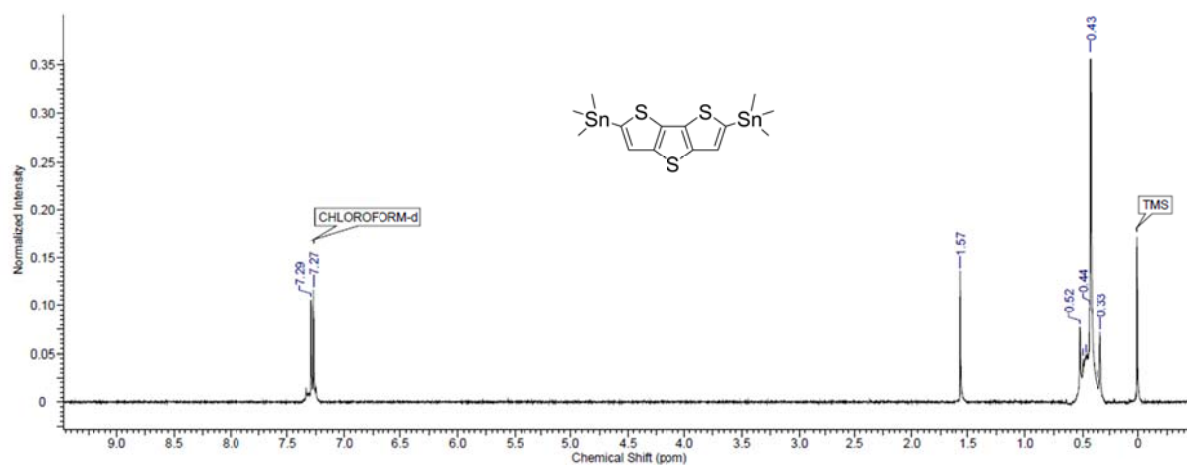

**Figure S21.**  $^1\text{H}$  NMR of bis(trimethyl-stannyl)DTT in  $\text{CDCl}_3$ .

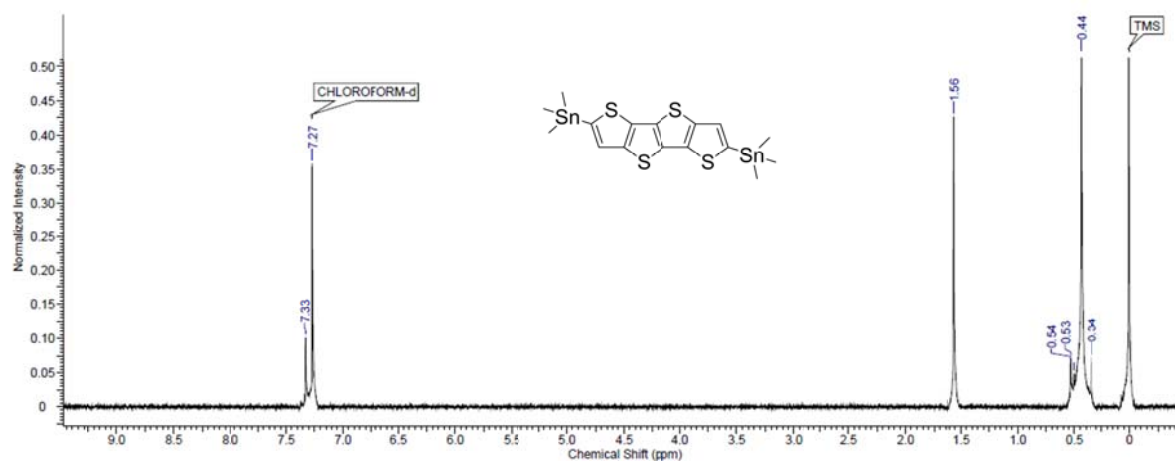

**Figure S22.**  $^1\text{H}$  NMR of bis(trimethyl-stannyl)TTTT in  $\text{CDCl}_3$ .

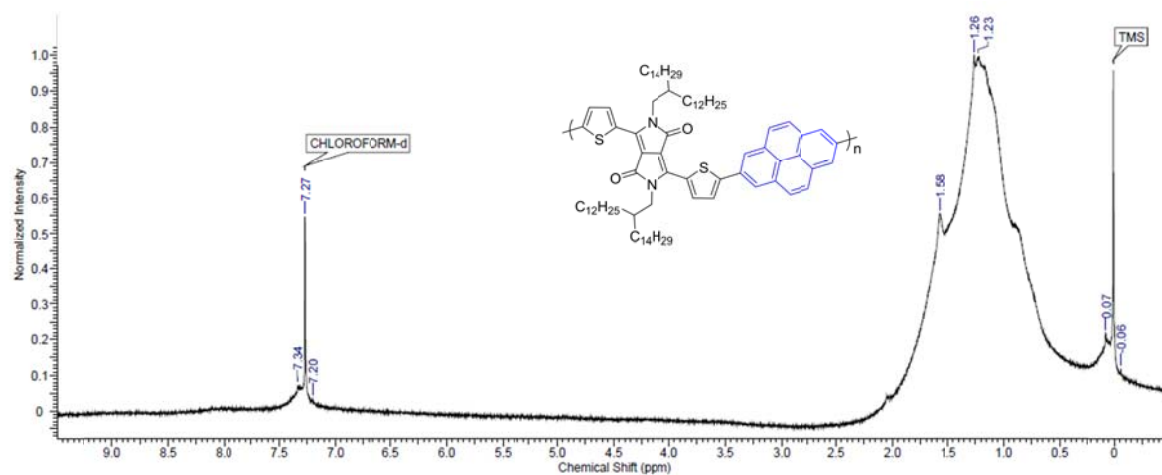

**Figure S23.**  $^1\text{H}$  NMR of PDPPPy in  $\text{CDCl}_3$ .

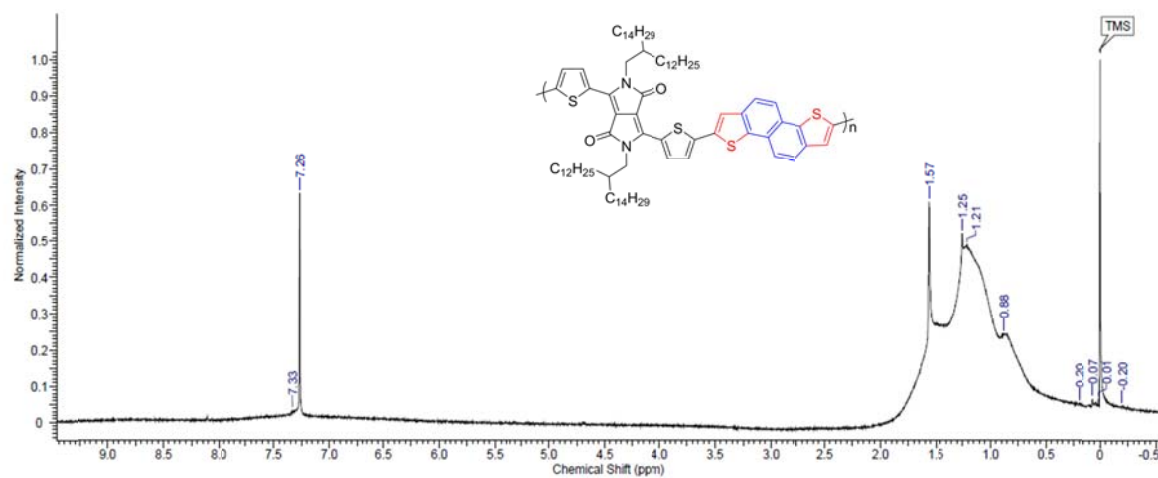

**Figure S24.**  $^1\text{H}$  NMR of PDPPNDT in  $\text{CDCl}_3$ .



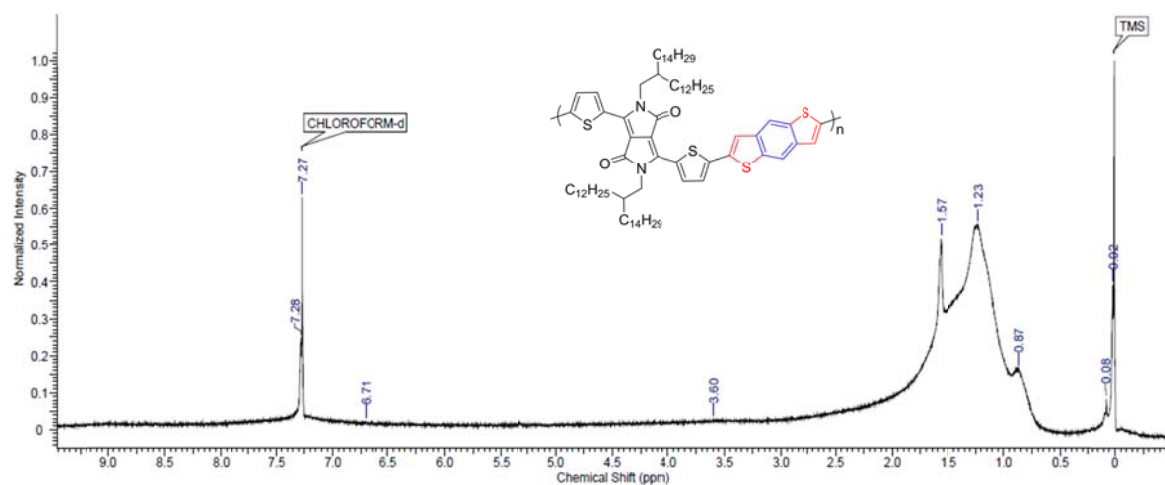

**Figure S25.**  $^1\text{H}$  NMR of PDPPBDT in  $\text{CDCl}_3$ .

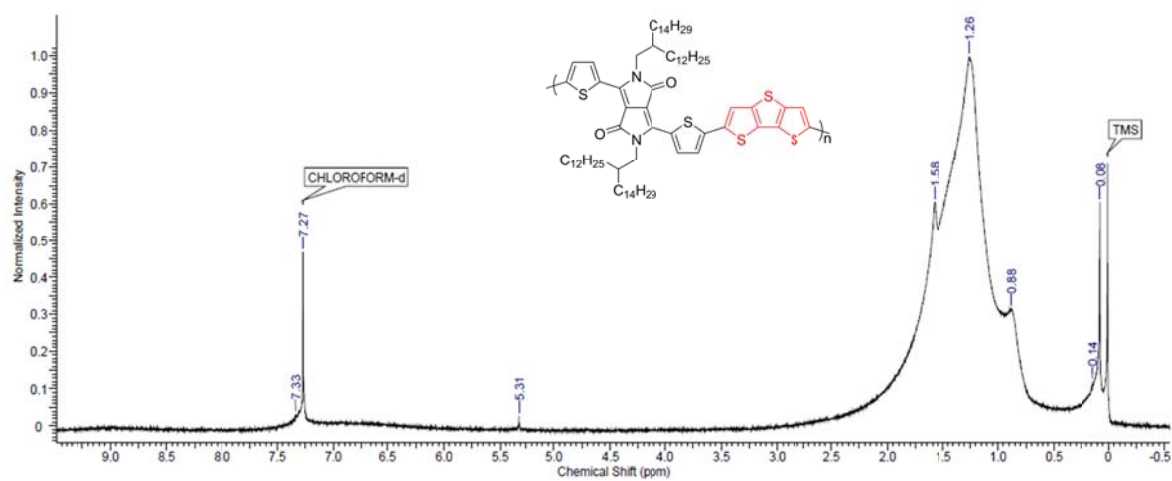

**Figure S26.**  $^1\text{H}$  NMR of PDPPDIT in  $\text{CDCl}_3$ .

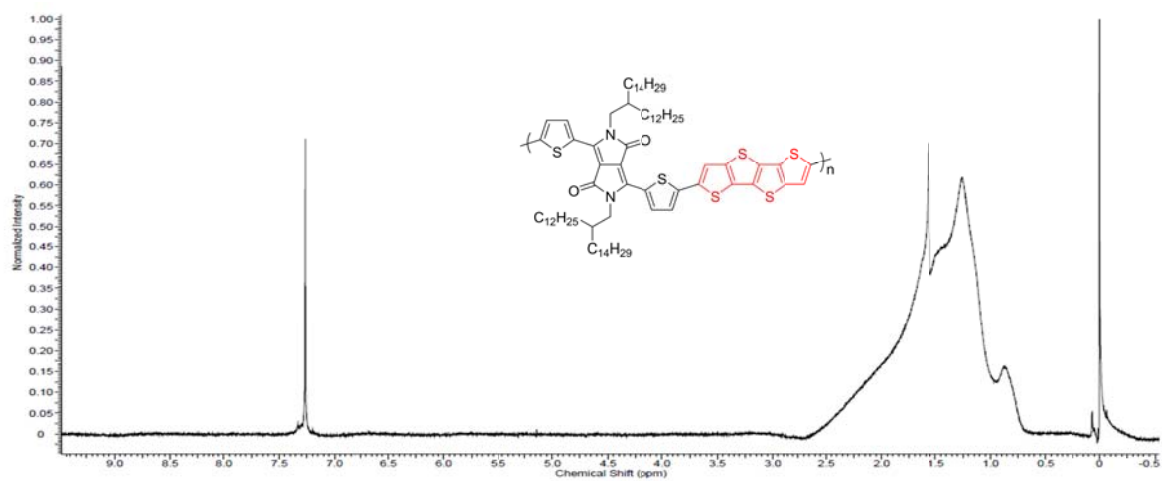

**Figure S27.**  $^1\text{H}$  NMR of PDPPTTTT in  $\text{CDCl}_3$ .

## 5. Thermal analysis data of acene-containing conjugated polymers

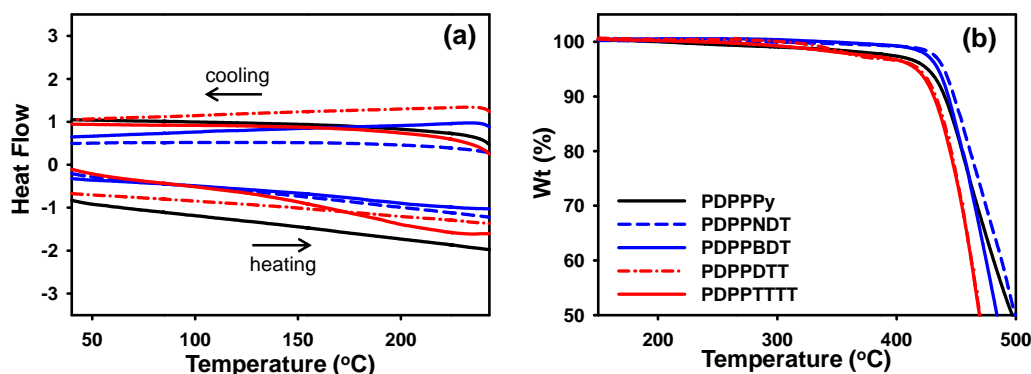

**Figure S28.** (a) DSC and (b) TGA thermograms of PDPPPy (black), PDPPNDT (blue dashed line), PDPPBDT (blue solid line), PDPPD TT (red dashed-dot line), and PDPPTTTT (red solid line).  $T_d = 432\text{ }^{\circ}\text{C}$ ,  $436\text{ }^{\circ}\text{C}$ ,  $439\text{ }^{\circ}\text{C}$ ,  $432\text{ }^{\circ}\text{C}$ , and  $433\text{ }^{\circ}\text{C}$  for PDPPPy, PDPPNDT, PDPPBDT, PDPPD TT, and PDPPTTTT, respectively.

## 6. GI-XRD data of the unannealed films of acene-containing conjugated polymers

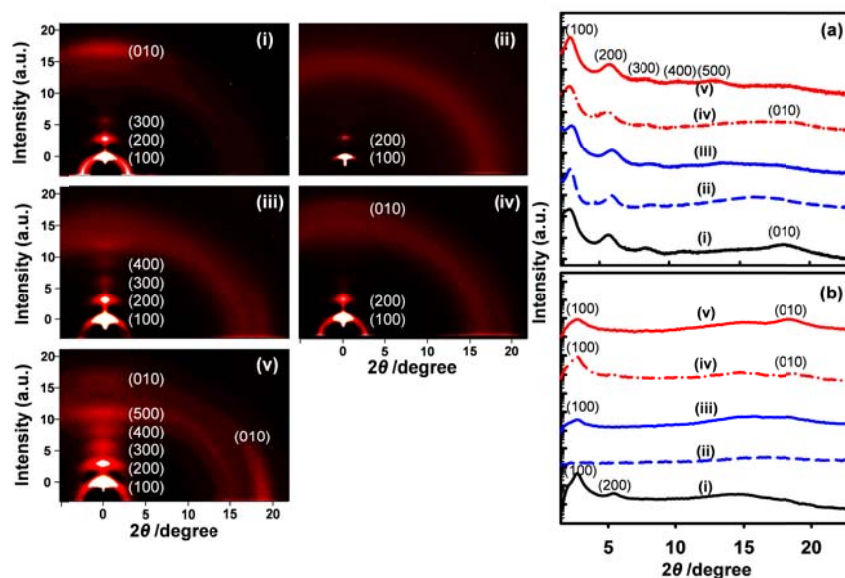

**Figure S29.** 2-D GI-XRD patterns, (a) out-of-plane and (b) in-plane XRD patterns of unannealed films. (i) PDPPPy (black solid line), (ii) PDPPNDT (blue dashed line), (iii) PDPPBDT (blue solid line), (iv) PDPPD TT (red dash-dot-dashed line), and (v) PDPPTTTT (red solid line).

**Table S1.** Peak assignments for the out-of-plane and in-plane XRD patterns of thin films annealed at 200 °C.

|                 |                 | Out-of-plane |       |       |       |       | In-plane |       |       |
|-----------------|-----------------|--------------|-------|-------|-------|-------|----------|-------|-------|
|                 |                 | (100)        | (200) | (300) | (400) | (500) | (100)    | (200) | (010) |
| <b>PDPPPy</b>   | $2\theta$ (deg) | 2.91         | 5.68  | 8.40  | 11.20 |       | 2.67     | 5.40  |       |
|                 | d-spacing (Å)   | 22.94        | 11.76 | 7.95  | 5.97  |       | 25       | 12.37 |       |
| <b>PDPPNDT</b>  | $2\theta$ (deg) | 3.08         | 6.07  | 8.97  | 11.64 | 13.67 |          |       | 18.16 |
|                 | d-spacing (Å)   | 21.68        | 11    | 7.45  | 5.75  | 4.90  |          |       | 3.69  |
| <b>PDPPBDT</b>  | $2\theta$ (deg) | 3            | 5.91  | 8.70  | 11.18 | 13.77 |          |       | 17.93 |
|                 | d-spacing (Å)   | 22.26        | 11.3  | 7.68  | 5.98  | 4.86  |          |       | 3.74  |
| <b>PDPPDTT</b>  | $2\theta$ (deg) | 2.88         | 5.78  | 8.54  | 11.36 | 13.67 | 2.65     |       | 18.93 |
|                 | d-spacing (Å)   | 23.15        | 11.56 | 7.82  | 5.89  | 4.90  | 25.19    |       | 3.54  |
| <b>PDPPTTTT</b> | $2\theta$ (deg) | 2.98         | 5.89  | 8.70  | 11.40 | 13.71 |          |       | 18.6  |
|                 | d-spacing (Å)   | 22.4         | 11.34 | 7.68  | 5.87  | 4.88  |          |       | 3.60  |

## 7. AFM height images of the polymer films

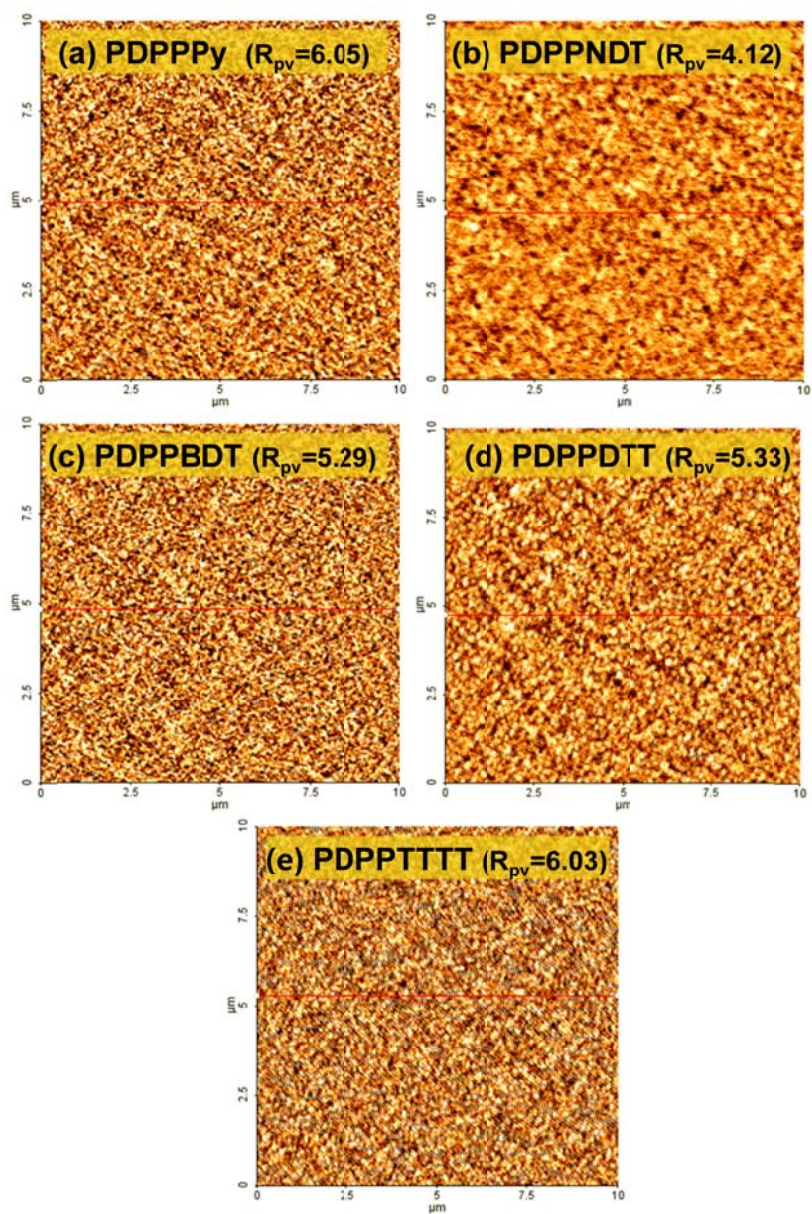

**Figure S30.** AFM height images of (a) PDPPPy, (b) PDPPNDT, (c) PDPPBDT, (d) PDPPDTT, and (e) PDPPTTTT thin films annealed thermally at 200 °C.

## 8. Transfer and output curves of TFTs made of the polymers

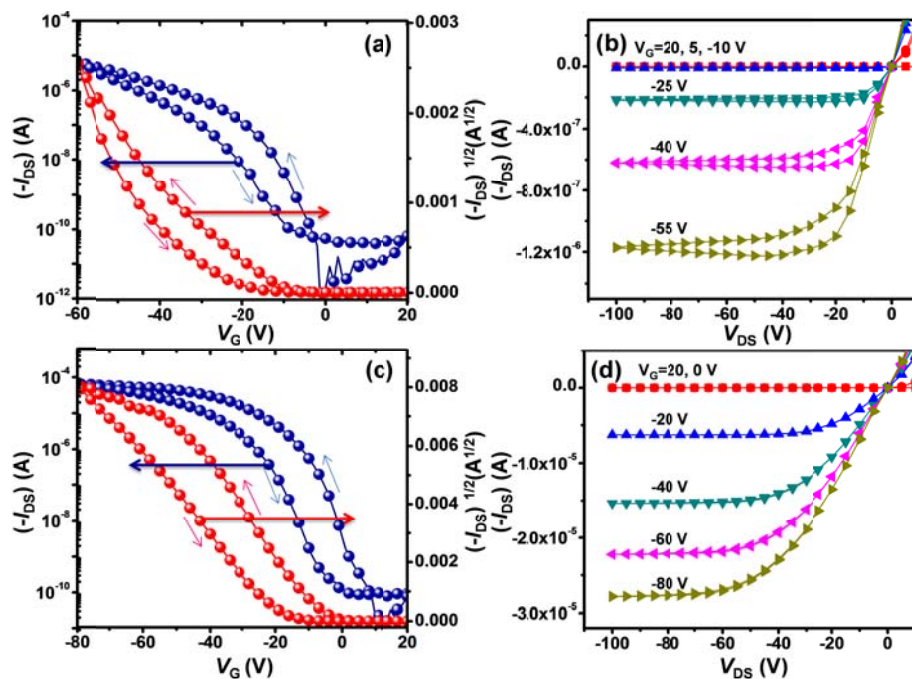

**Figure S31.** (a), (c) Transfer and (b), (d) output curves of TFTs made of PDPPPy.  $V_{DS} = -100$  V (a), (b) unannealed films and (c), (d) films annealed at 200 °C.

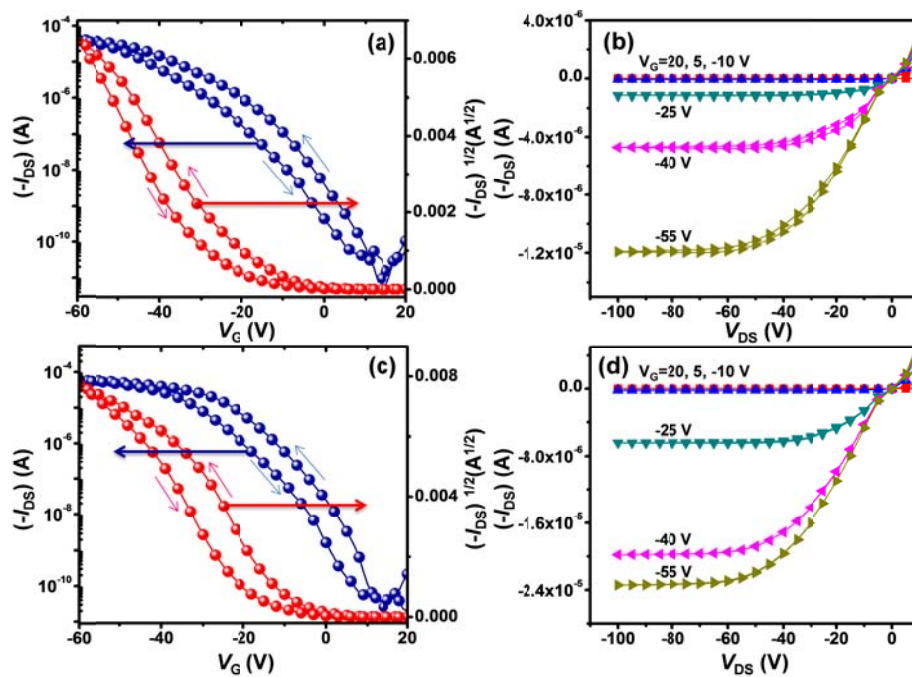

**Figure S32.** (a), (c) Transfer and (b), (d) output curves of TFTs made of PDPPNDT.  $V_{DS} = -100$  V (a), (b) unannealed films and (c), (d) films annealed at 200 °C.



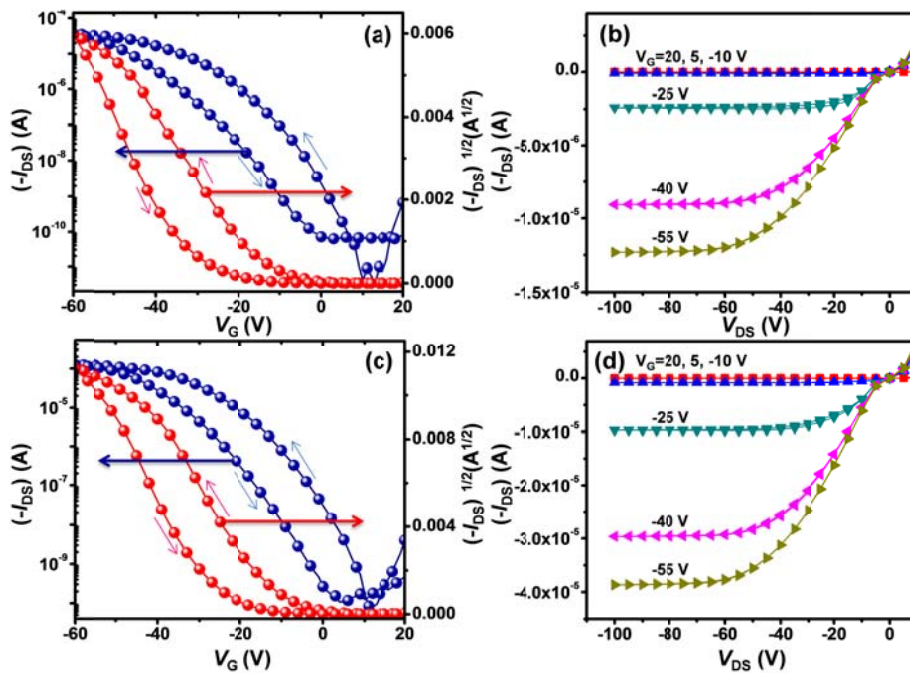

**Figure S33.** (a), (c) Transfer and (b), (d) output curves of TFTs made of PDPPBDT.  $V_{DS} = -100$  V (a), (b) unannealed films and (c), (d) films annealed at 200 °C.

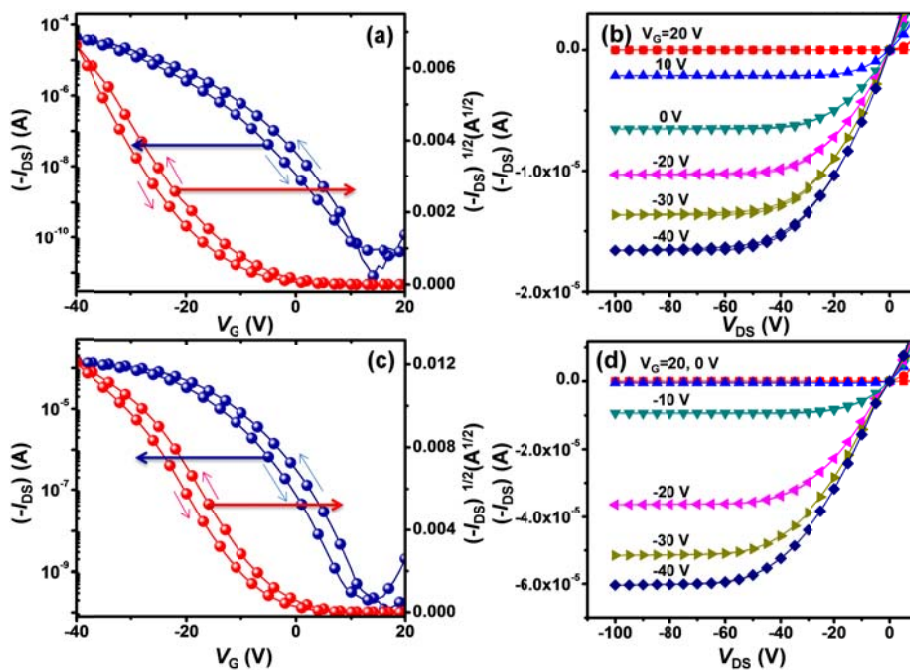

**Figure S34.** (a), (c) Transfer and (b), (d) output curves of TFTs made of PDPPDIT.  $V_{DS} = -100$  V (a), (b) unannealed films and (c), (d) films annealed at 200 °C.

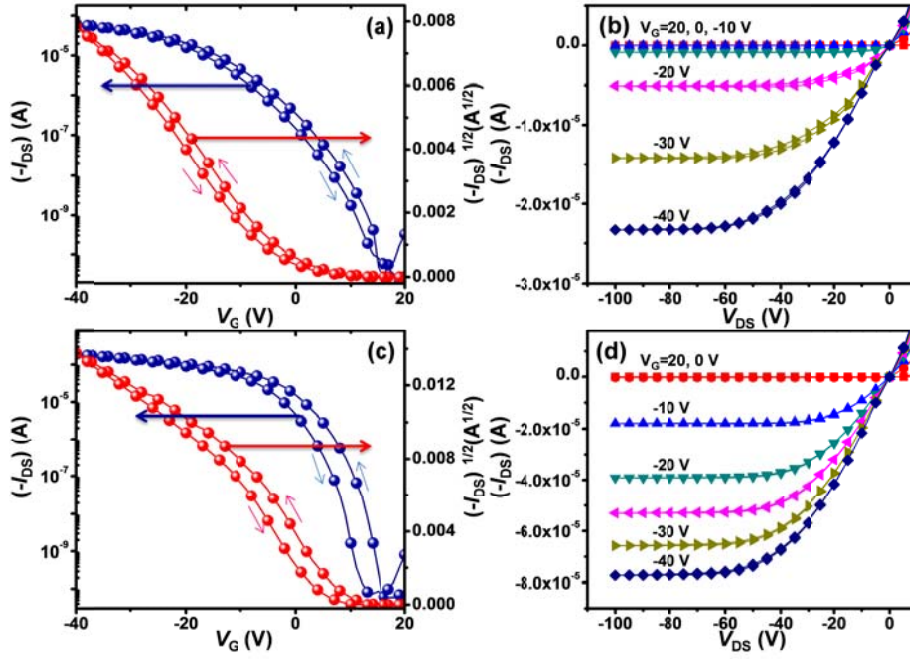

**Figure S35.** (a), (c) Transfer and (b), (d) output curves of TFTs made of PDPPTTTT.  $V_{DS} = -100$  V (a), (b) unannealed films and (c), (d) films annealed at 200 °C.

## 9. Properties of resistor-loaded inverters

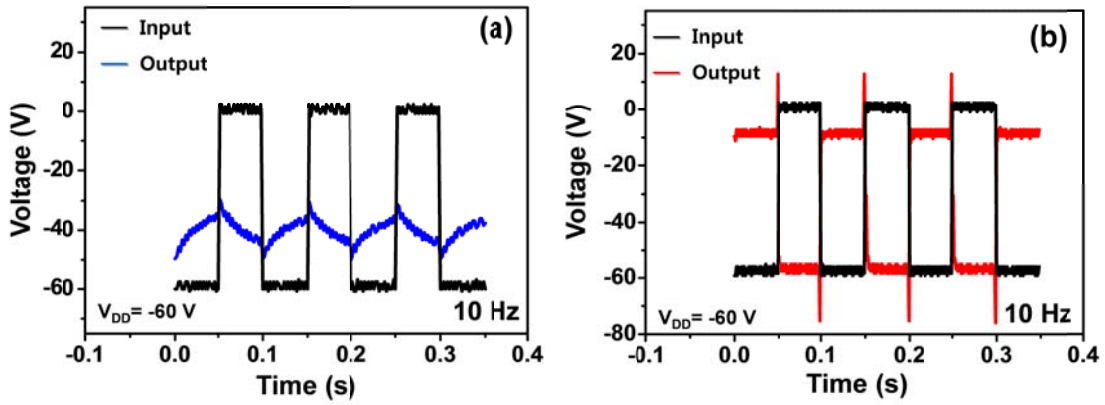

**Figure S36.** Resistor loaded inverters. (a) poly(3-hexylthiophene) (P3HT)-based RL-inverter at 10 Hz. (hole mobility of  $5 \times 10^{-3} \text{ cm}^2 \text{ V}^{-1} \text{ s}^{-1}$ ). (b) PDPPTTTT-based RL-inverter at 10 Hz exhibiting a hole mobility of  $3.2 \text{ cm}^2 \text{ V}^{-1} \text{ s}^{-1}$  at  $V_{DS} = -100$  V.

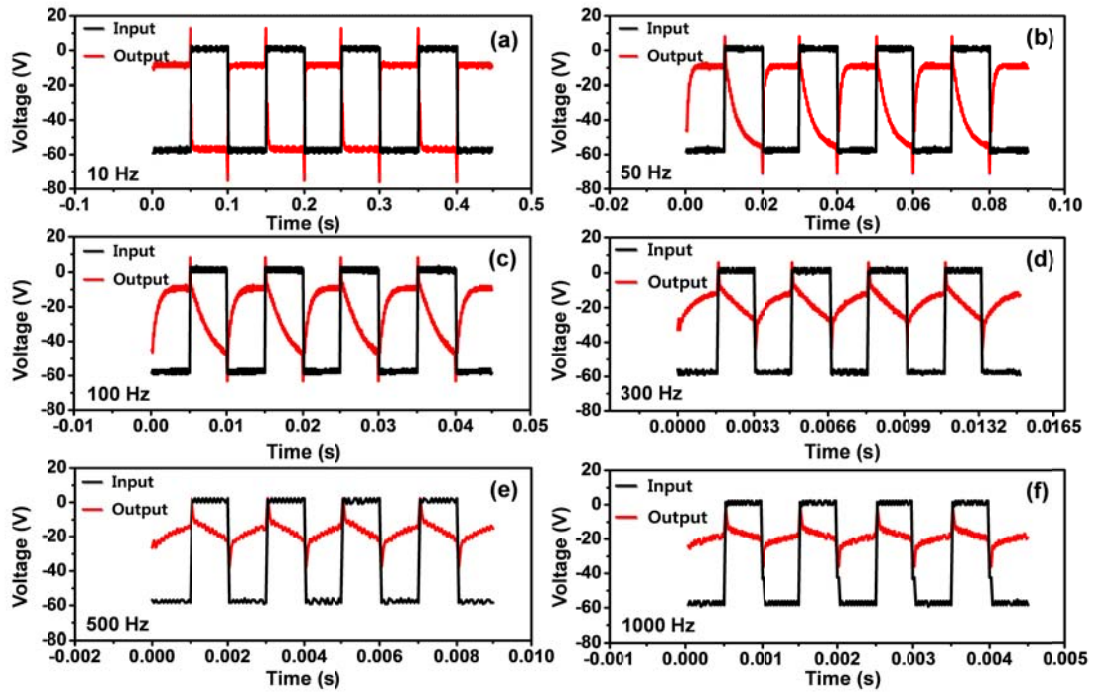

**Figure S37.** Dynamic output voltage response of PDPPTTTT polymer-based RL-inverter. Output responses when the input voltage was switched from 10 Hz to 1 kHz.

**Figure S37** shows the drain current output ( $V_{OUT}$ ) of PDPPTTTT-based inverter in response to 10 Hz and 1kHz square-wave gate voltage input ( $V_{IN}$ ) signals when the drain voltage ( $V_{DD}$ ) was fixed at -60 V. It is clearly observed that the output voltage ( $V_{OUT}$ ) of the inverter tracks the trace of the input square wave gate voltage signal ( $V_G = V_{IN}$ ) even at 1 kHz.



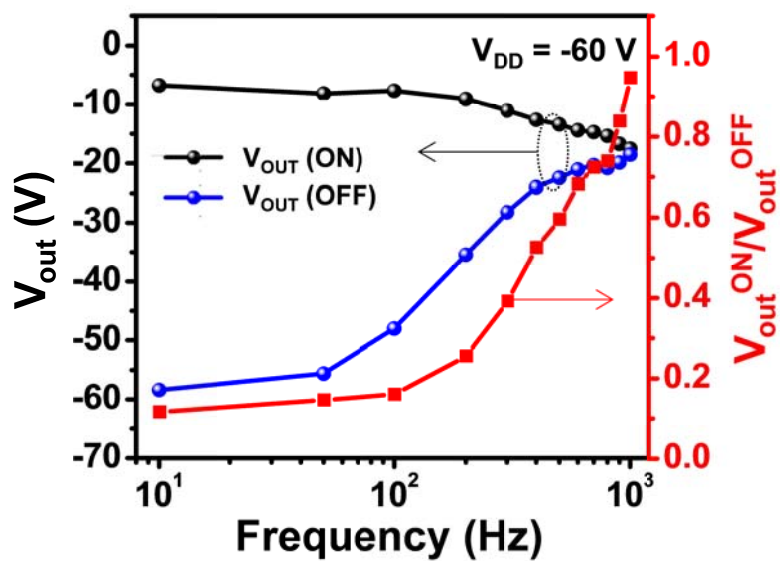

**Figure S38.** Output voltages at “ON” and “OFF” states of PDPPTTTT-based resistor-loaded inverter as a function of switching frequency. \*Square:  $V_{\text{out}}^{\text{ON}} / V_{\text{out}}^{\text{OFF}}$

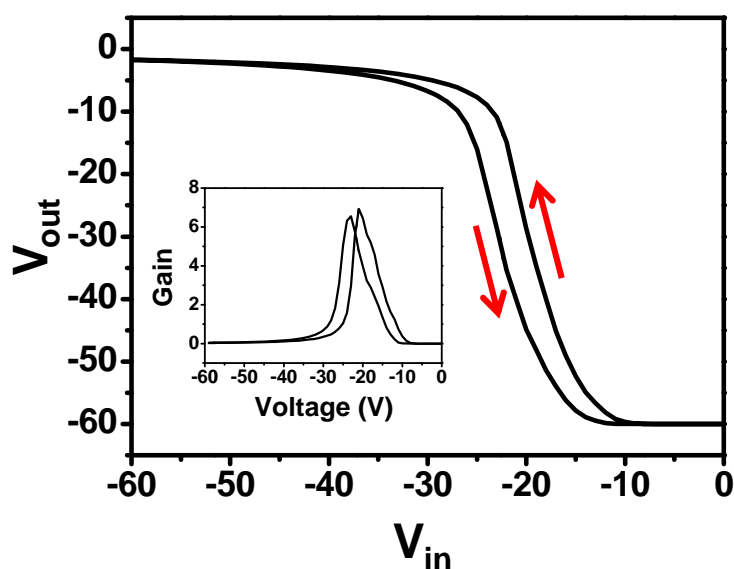

**Figure S39.** Input-output voltage characteristics of the PDPPTTTT RL-inverter measured with increasing and decreasing input voltage,  $V_{\text{IN}}$ . ( $V_{\text{DD}} = -60$  V). Inset: voltage gain in the inverter as a function of  $V_{\text{IN}}$ .

The voltage transfer characteristics ( $V_{IN}$ - $V_{OUT}$ ) and corresponding gain of the RL inverter based on DPPPTTTT for forward (i.e., from 0 V to -60 V) and reverse (i.e., from -60 V to 0 V) scans at  $V_{DD} = -60$  V are shown in **Figure S39**. It is clear that the output voltage switched between logic from “1” state (-60 V) to the “0” state ( $\sim -2.0$  V) when the input signal was swept from -60 V to 0 V. The RL inverter shows a clear switching response with moderate hysteresis ( $\Delta V = 3$  V) between 0 V and -60 V with a voltage gain (i.e.,  $dV_{OUT}/dV_{IN}$ ) of almost 7.

## Reference

1. Lee, T. W.; Lee, D. H.; Shin, J.; Cho, M. J.; Choi, D. H. *J. Polym. Sci. Part A: Polym. Chem.* **2013**, *51*, 5280.
